# Supplementary material for: Ethylene brassylate-co-δ-hexalactone biobased polymers for application in the medical field: synthesis, characterization and cell culture studies
Source: Royal Society of Chemistry journal article supplement (doi:10.1039/c6ra01065b), 2016-01-01
Supplement: c6ra01065b1.pdf [file c6ra01065b1.pdf]

## Supporting Information

Table S1. Crystallization enthalpies and temperatures obtained for the EB-co- $\delta$ -HL copolymers at cooling rates in the 5 - 30 °C min<sup>-1</sup> range.

| SAMPLE   | 5 °C min <sup>-1</sup>          |                     | 10 °C min <sup>-1</sup>         |                     | 20 °C min <sup>-1</sup>         |                     | 30 °C min <sup>-1</sup>         |                     |
|----------|---------------------------------|---------------------|---------------------------------|---------------------|---------------------------------|---------------------|---------------------------------|---------------------|
|          | $\Delta H$ (J g <sup>-1</sup> ) | T <sub>c</sub> (°C) | $\Delta H$ (J g <sup>-1</sup> ) | T <sub>c</sub> (°C) | $\Delta H$ (J g <sup>-1</sup> ) | T <sub>c</sub> (°C) | $\Delta H$ (J g <sup>-1</sup> ) | T <sub>c</sub> (°C) |
| PEB      | 91.1                            | 52.1                | 86.5                            | 49.2                | 84.8                            | 44.7                | 83.5                            | 40.9                |
| EB-HL 90 | 89.3                            | 47.9                | 86.0                            | 47.2                | 85.0                            | 40.2                | 84.9                            | 35.4                |
| EB-HL 83 | 76.0                            | 41.2                | 75.2                            | 36.8                | 71.6                            | 29.0                | 69.1                            | 21.5                |
| EB-HL 79 | 74.3                            | 36.4                | 67.4                            | 34.6                | 68.7                            | 24.7                | 64.9                            | 20.4                |
| EB-HL 70 | 63.4                            | 28.3                | 62.1                            | 25.0                | 60.0                            | 19.9                | 60.0                            | 16.0                |
| EB-HL 63 | 58.8                            | 25.5                | 58.0                            | 22.8                | 55.6                            | 18.6                | 54.5                            | 14.2                |
| EB-HL 49 | 40.6                            | 16.4                | 35.6                            | 13.8                | 35.1                            | 9.3                 | 33.3                            | 6.1                 |

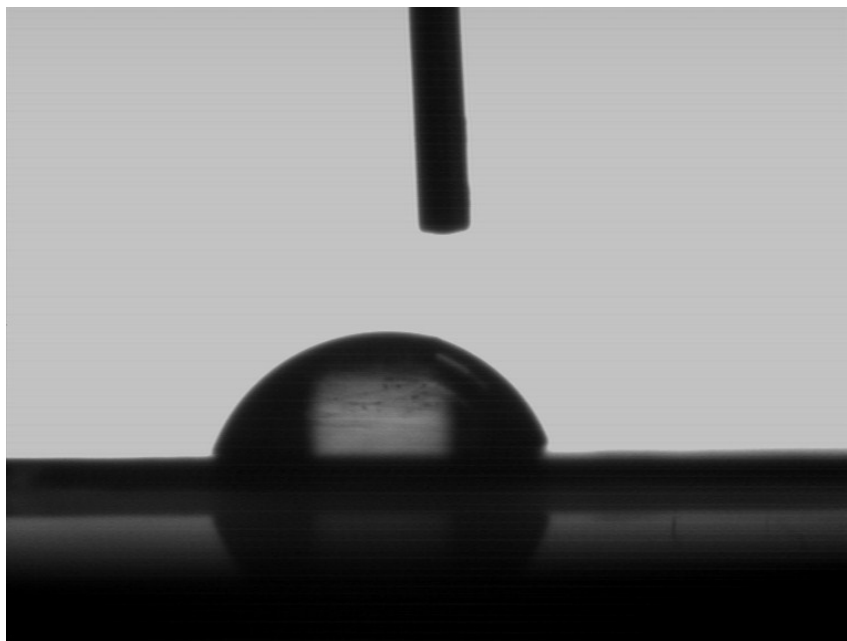

Figure S1. Example of Water Droplet on a film of the EB-co- $\delta$ -HL with 83% molar content of ethylene brassylate.

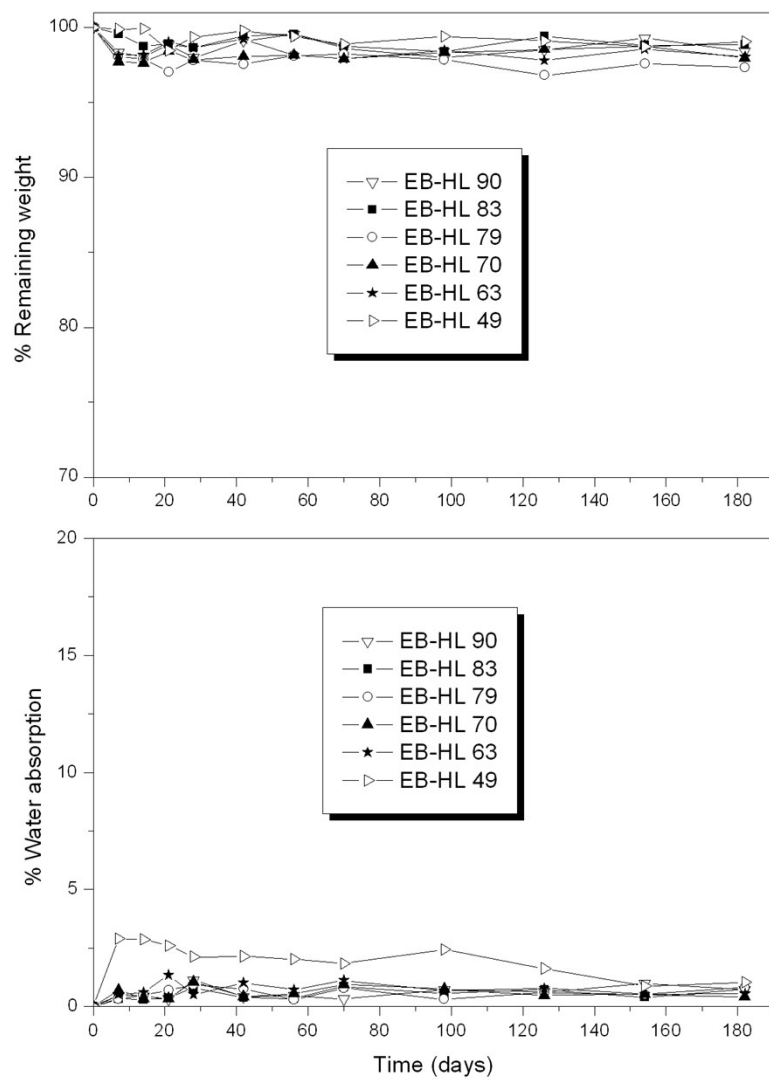

Figure S2. Evolution of the remaining weight and the water absorption of the poly(ethylene brassylate-co- $\delta$ -hexalactone)

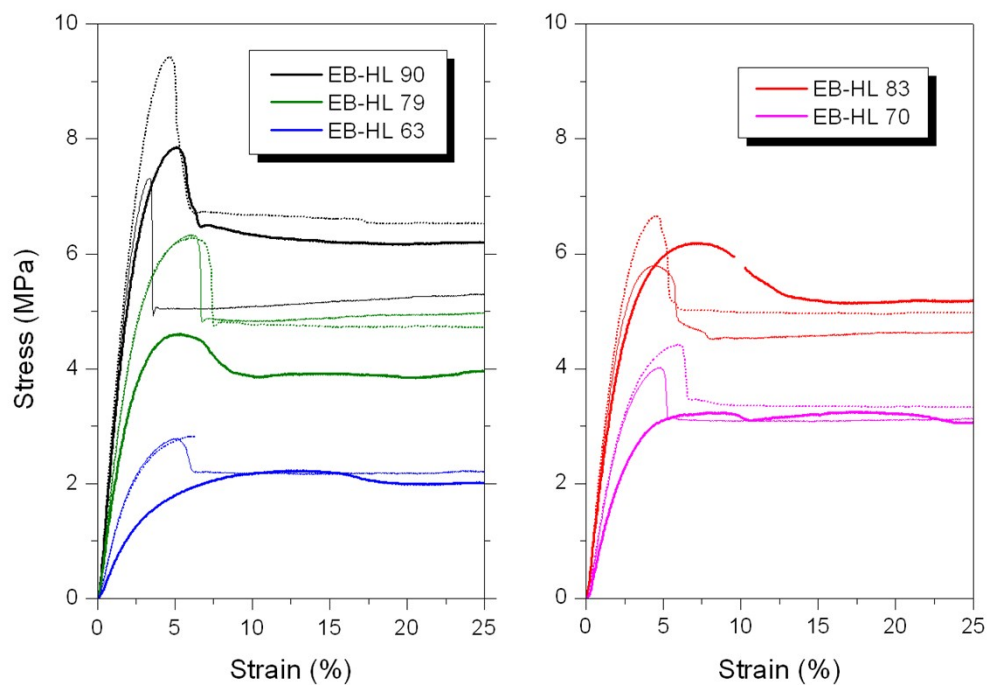

Figure S3. Tensile stress-strain curves until 25% of strain of the EB-co- $\delta$ -HL copolymers tested at 37°C. The curves of the non-degraded samples are in bold and those on day 182 of degradation are dotted. The curves on day 70 of degradation are also shown.
